# Supplementary material for: Plasma synthesis of oxygen vacancy-rich CuO/Cu2(OH)3NO3 heterostructure nanosheets for boosting degradation performance
Source: Royal Society of Chemistry journal article supplement (doi:10.1039/d3cp03918h), 2023-01-01
Supplement: d3cp03918h1.pdf [file d3cp03918h1.pdf]

## Supporting Information

### Plasma synthesis of oxygen vacancy-rich $\text{CuO}/\text{Cu}_2(\text{OH})_3\text{NO}_3$ heterostructure nanosheets for boosting degradation performance

Zikun Yang,<sup>[a]</sup> Xiangfeng Peng,<sup>[a]</sup> Jingxuan Zheng,<sup>[a]</sup> Zhao Wang\*<sup>[a]</sup>

a. National Engineering Research Center of Industry Crystallization Technology, School of Chemical Engineering and Technology, Tianjin University

E-mail: wangzhao@tju.edu.cn.

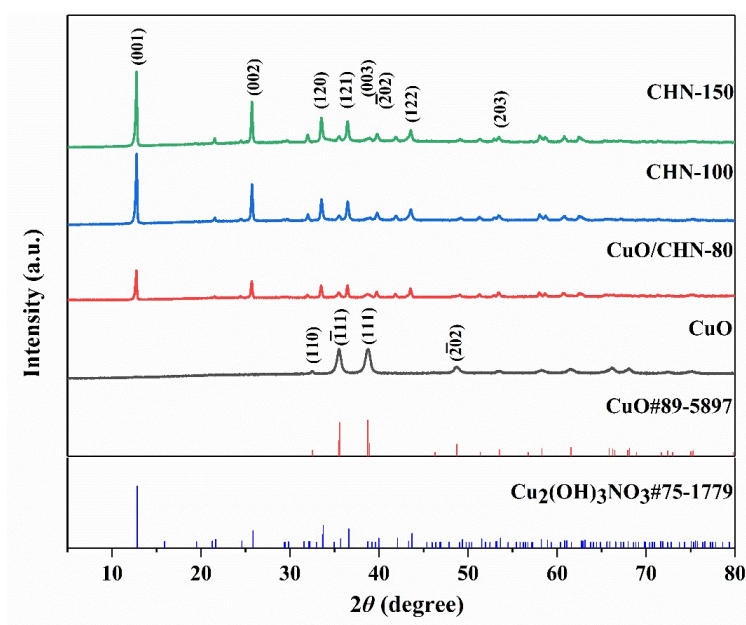

**Fig. S1** XRD spectra of the samples by DBD plasma treatment with different powers.

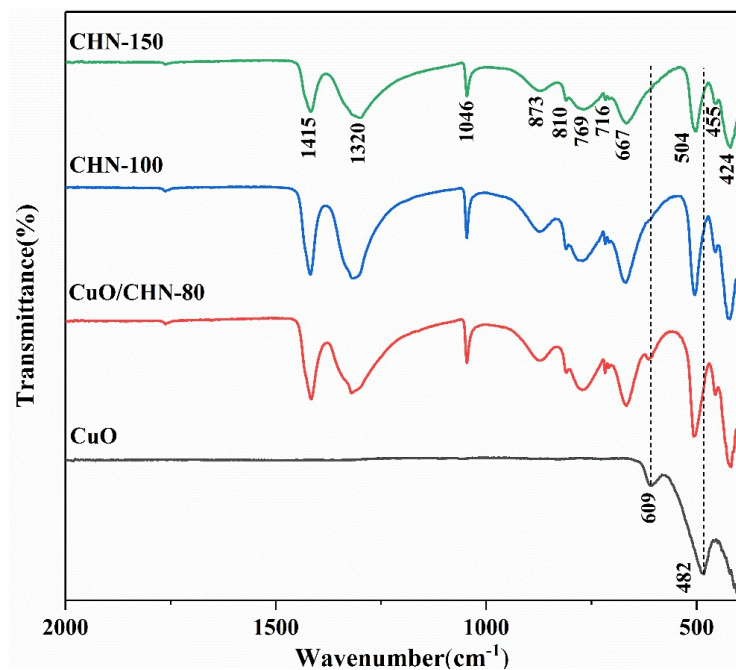

Fig. S2 FT-IR spectra of CuO and samples at different plasma treatment powers.

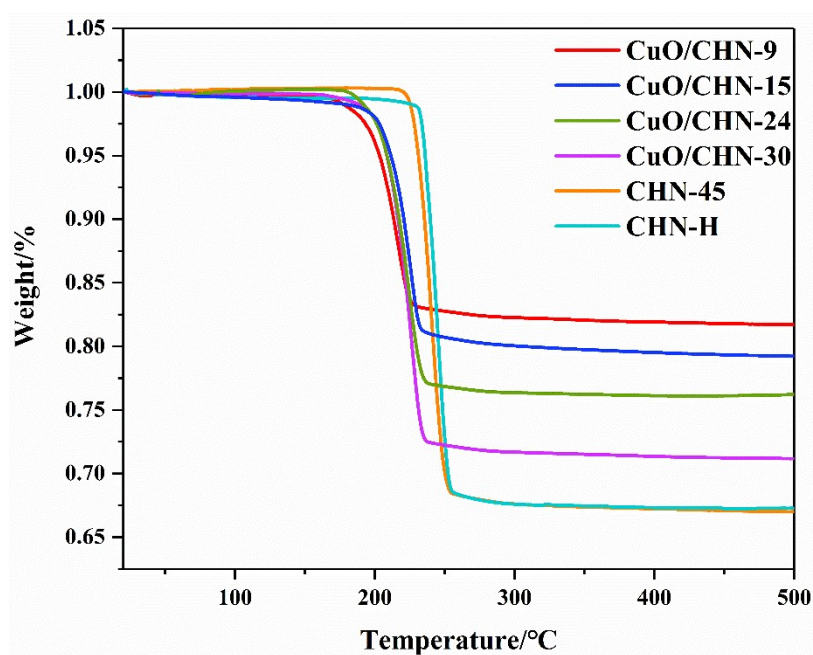

Fig. S3 TGA curves for the samples.

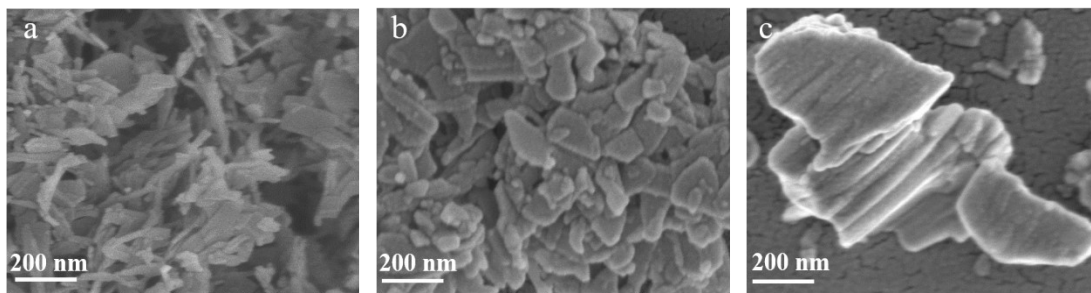

**Fig. S4** SEM images of the samples (a) CuO/CHN-80 and (b) CHN-100 and (c) CHN-150.

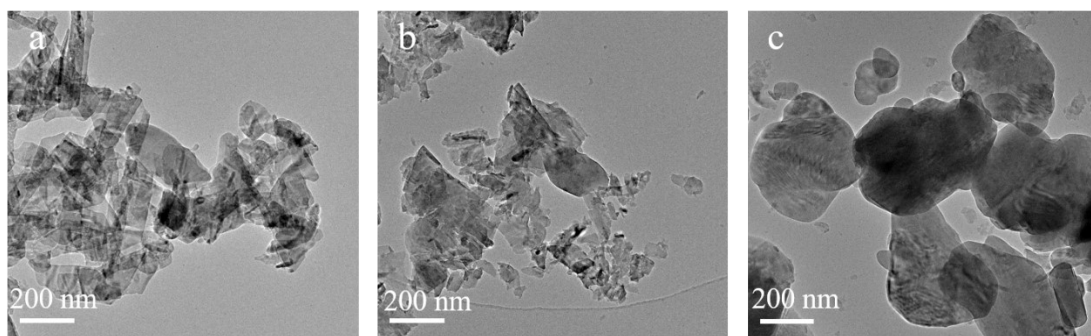

**Fig. S5** TEM images of the samples (a) CuO/CHN-80 and (b) CHN-100 and (c) CHN-150.

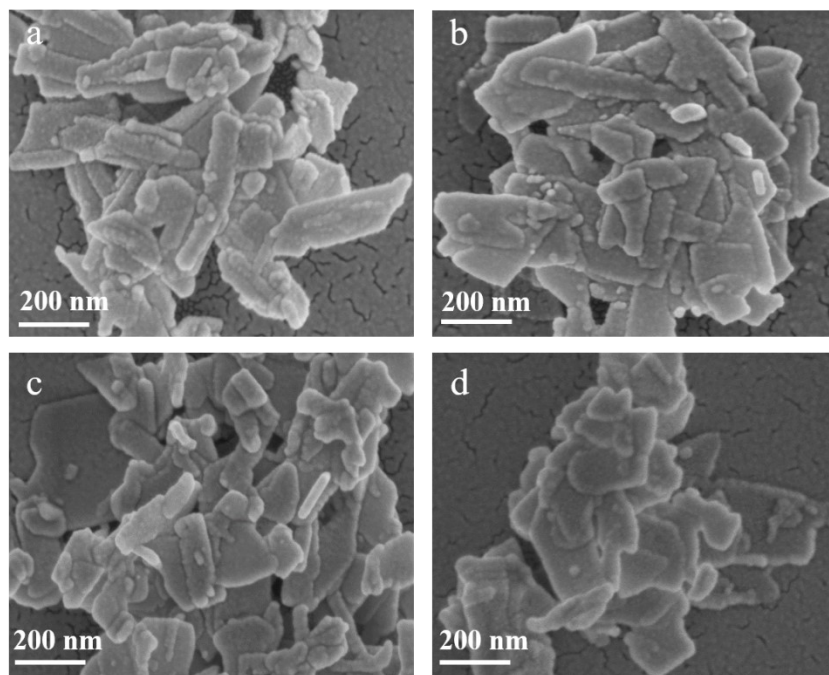

**Fig.S6** SEM images of the samples (a) CuO/CHN-9, (b) CuO/CHN-15, (c) CuO/CHN-30 and (d) CHN-45.

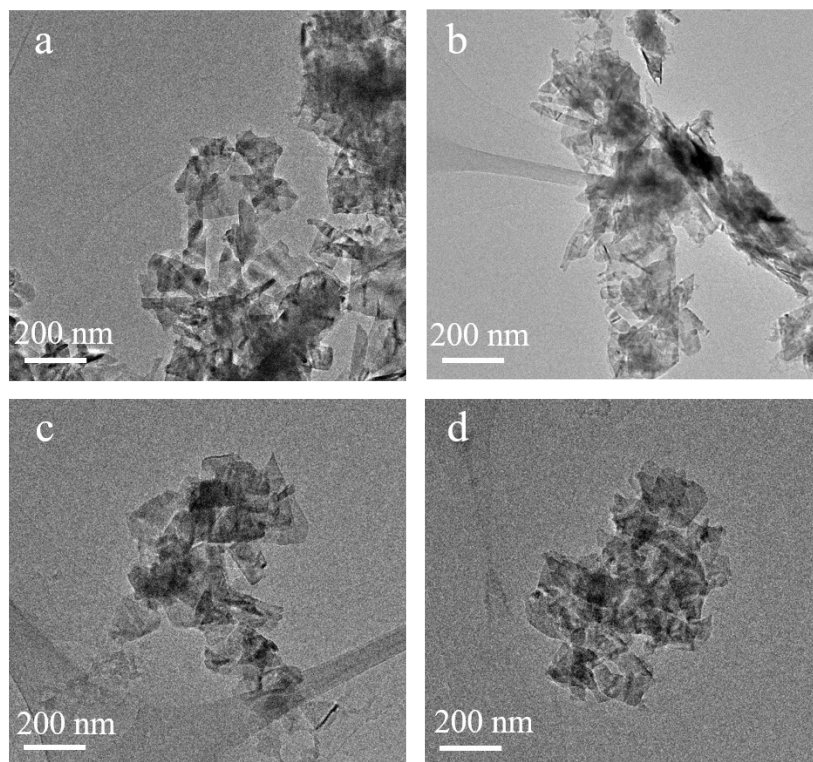

**Fig. S7** TEM images of the samples (a) CuO/CHN-9, (b) CuO/CHN-15, (c) CuO/CHN-30, (d) CHN-45.



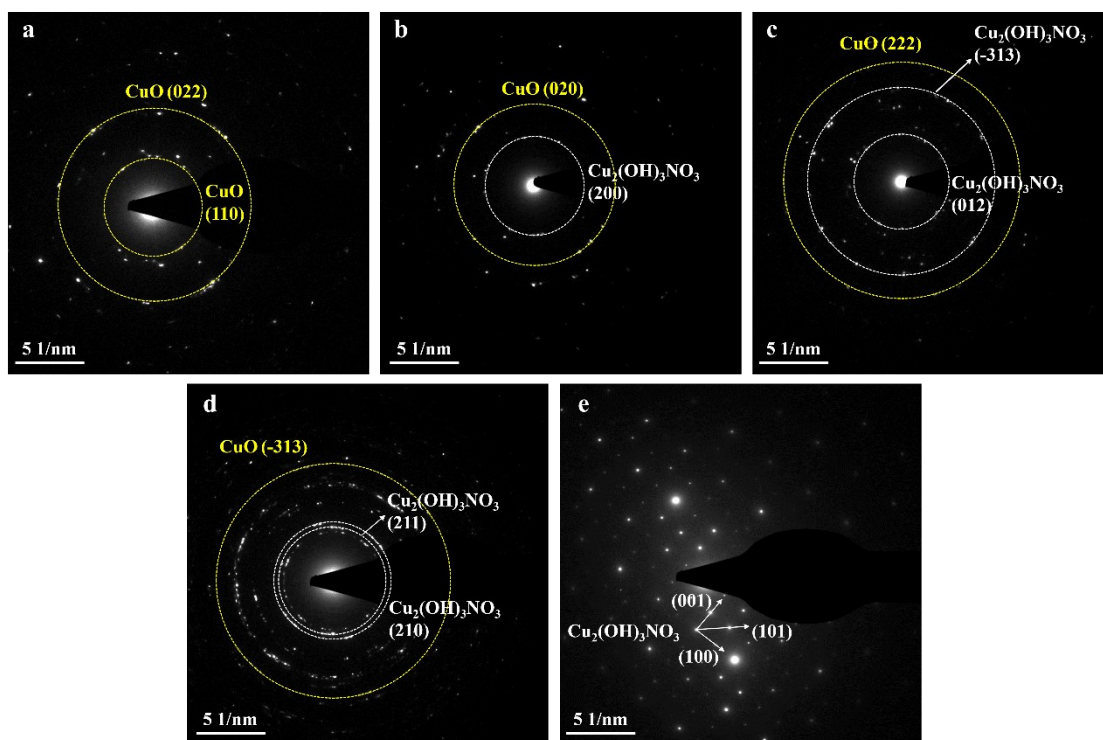

**Fig. S8** SAED patterns of the samples: (a) CuO, (b) CuO/CHN-15, (c) CuO/CHN-24, (d) CuO/CHN-30, (e) CHN-45.

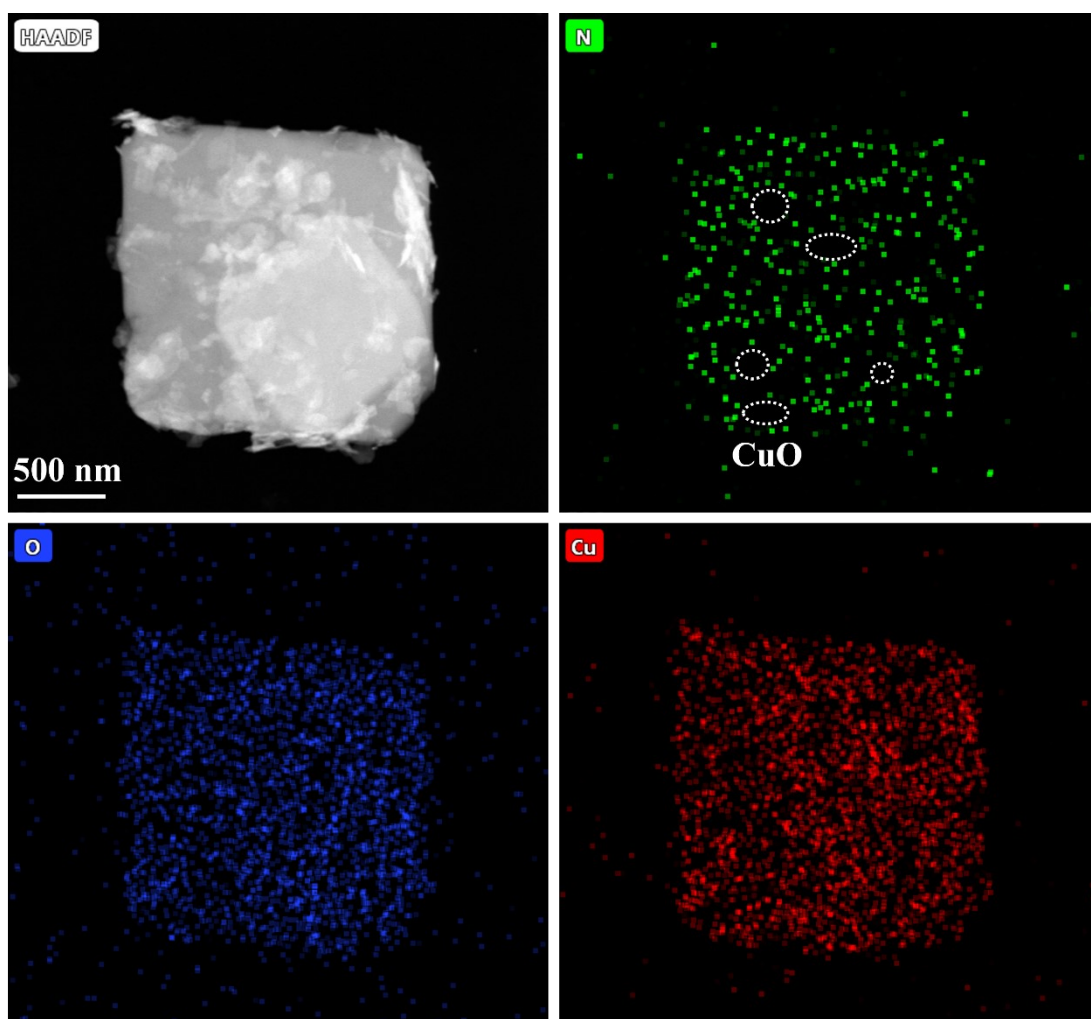

**Fig. S9** EDS elemental mapping images of CuO/CHN-24.

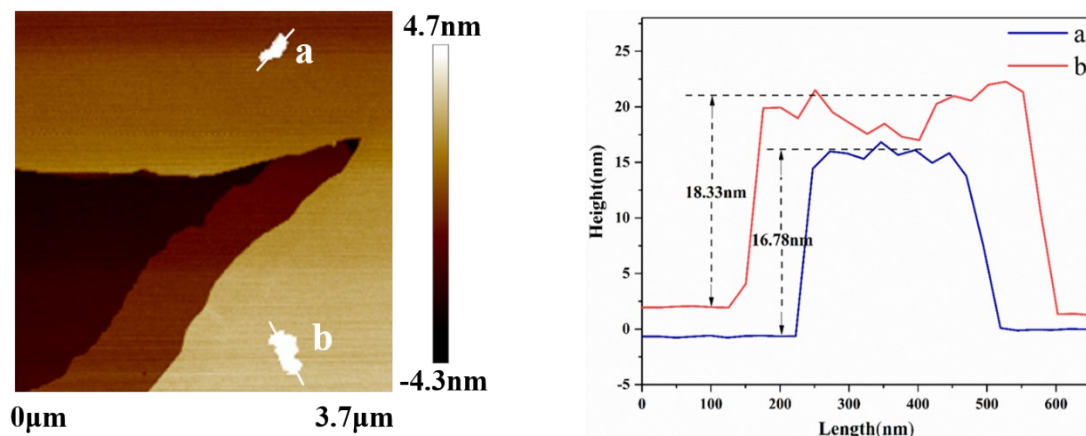

**Fig. S10** AFM images and corresponding height curves of CuO.

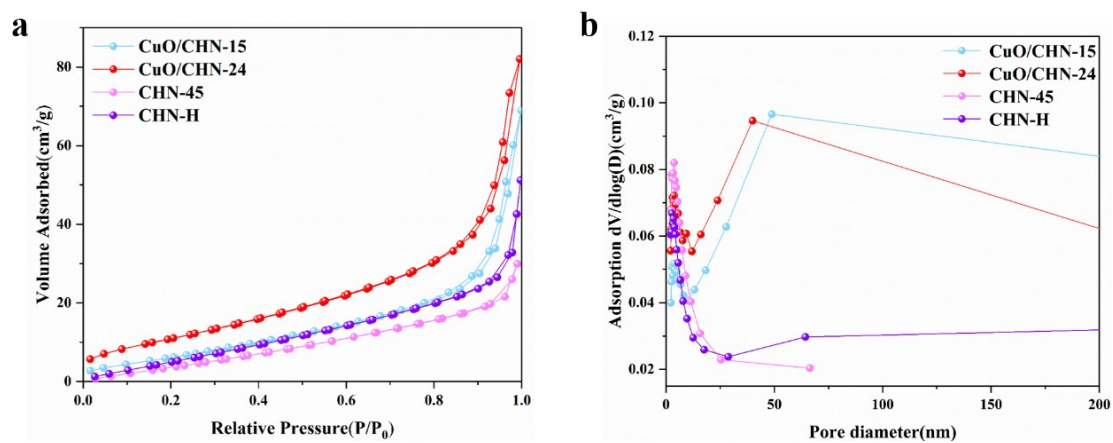

**Fig. S11** (a)  $N_2$ -adsorption/desorption isotherms and (b) pore size distributions of the samples.

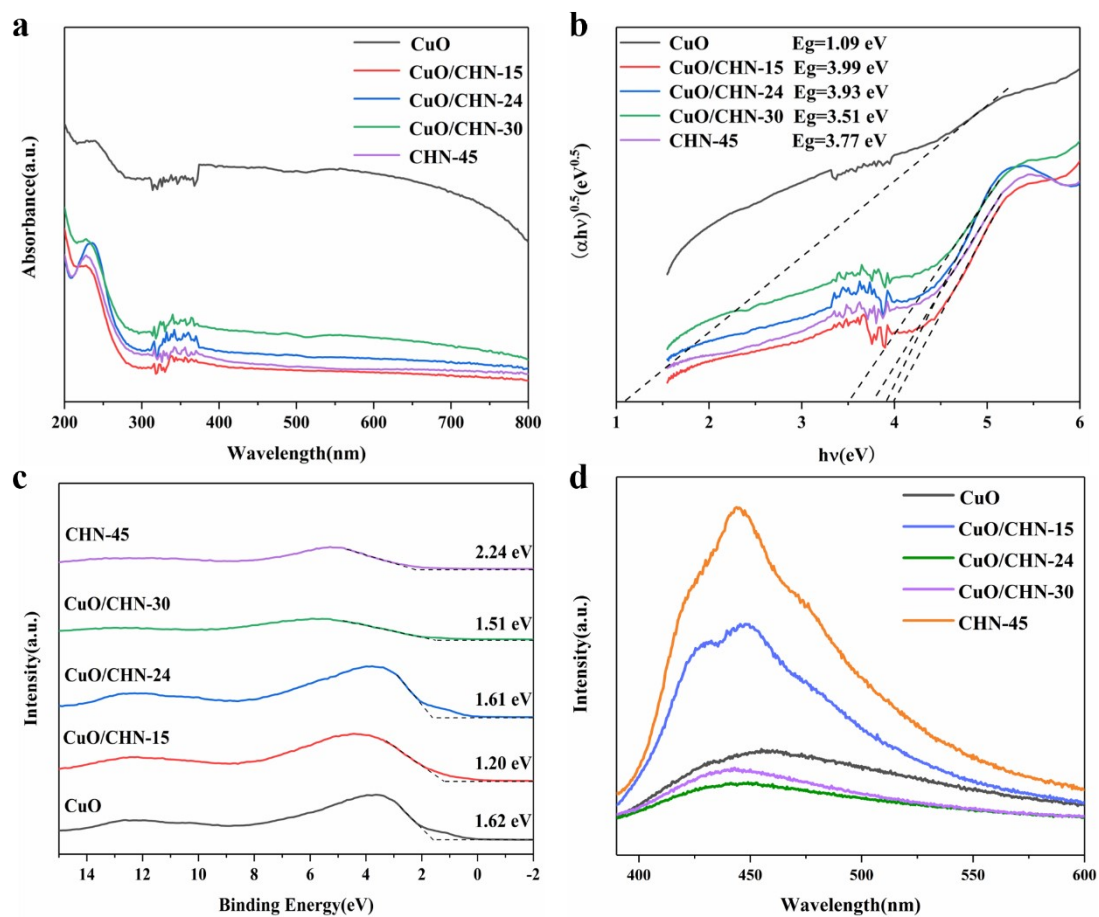

**Fig. S12** (a) UV-vis DRS spectra, (b) Tauc plots, (c) VB-XPS spectra, (d) PL spectra of Samples at different DBD treatment times.

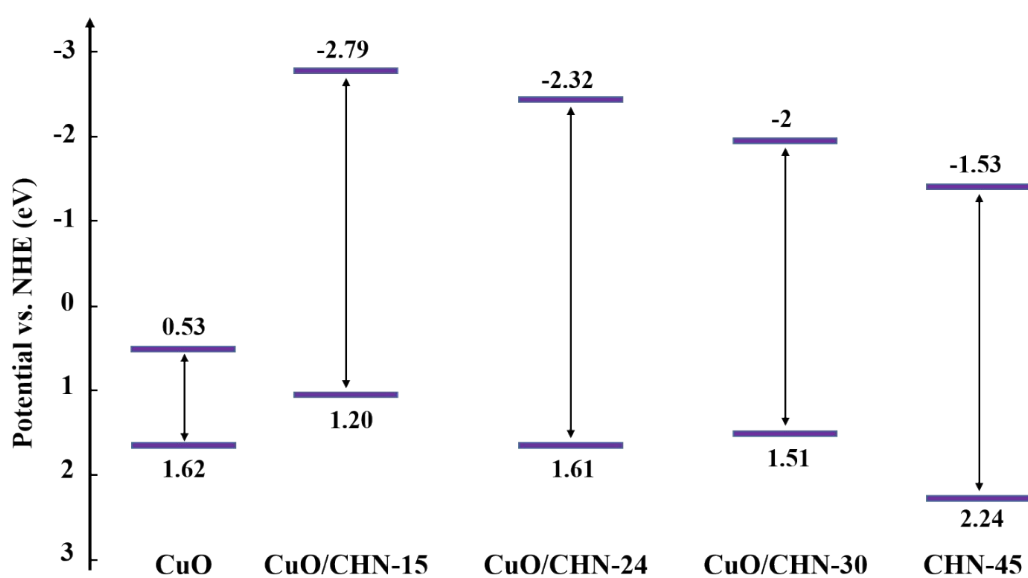

**Fig. S13** Energy band diagrams of the samples at different DBD treatment times.



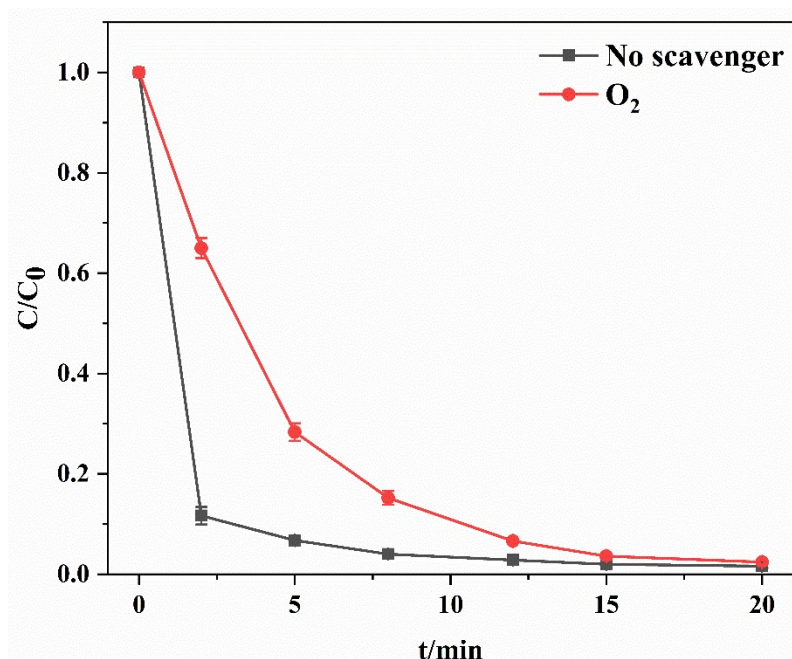

**Fig. S14** Degradation activity of CuO/CHN-24 under different oxygen vacancy conditions.

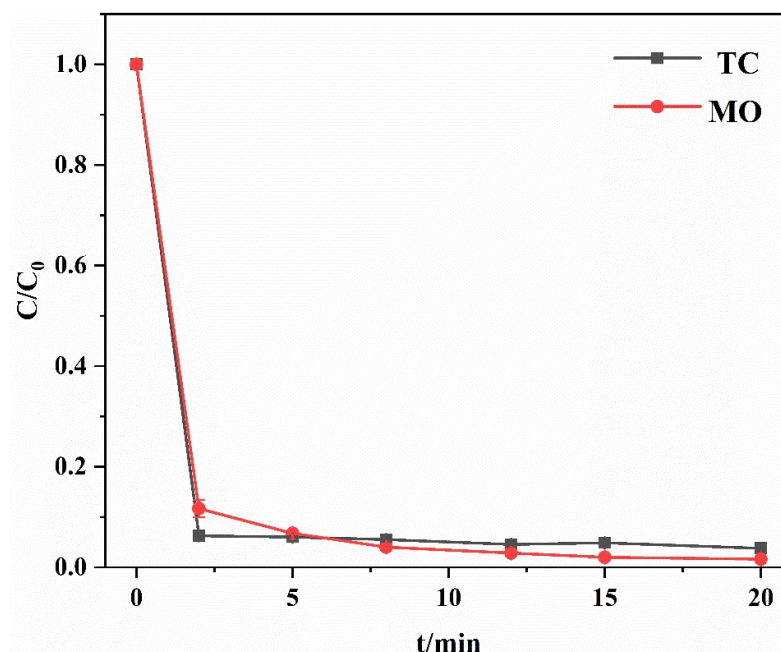

**Fig. S15** Comparison of the activity of CuO/CHN-24 in degrading different pollutants (catalyst=20 mg, pollutant=100 mL,20mg/L).

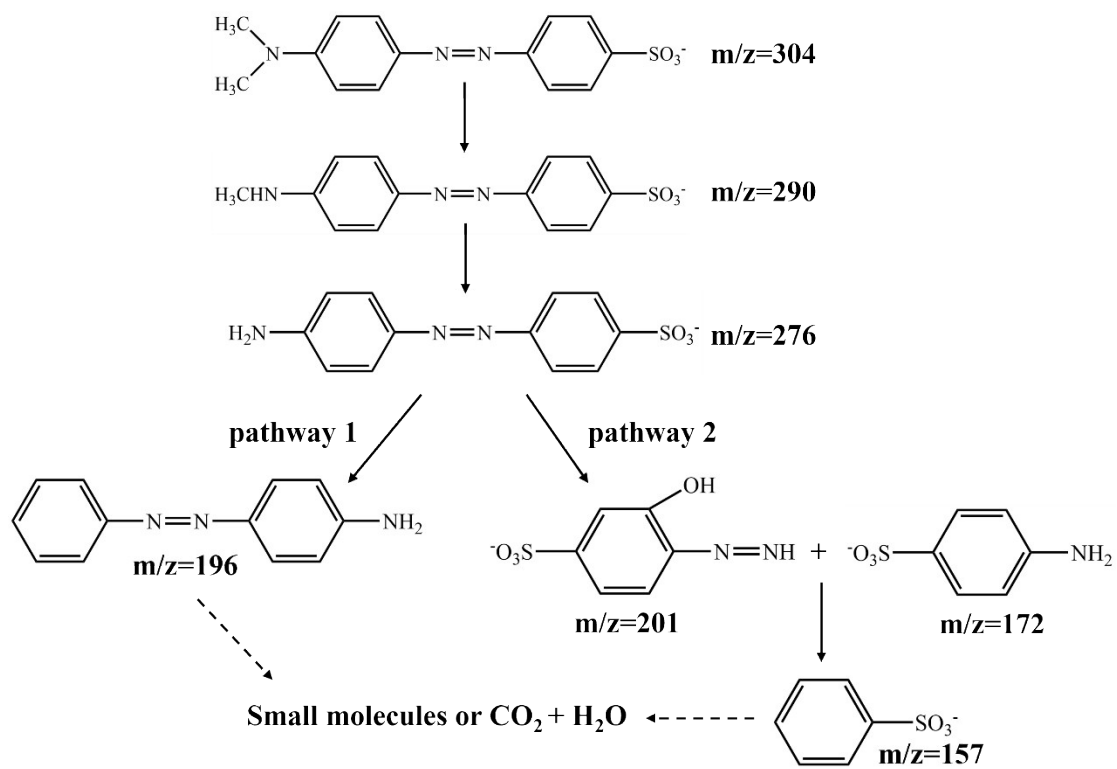

**Fig. S16** Proposed degradation pathways of MO in the  $\text{CuO}/\text{Cu}_2(\text{OH})_3\text{NO}_3$  system.

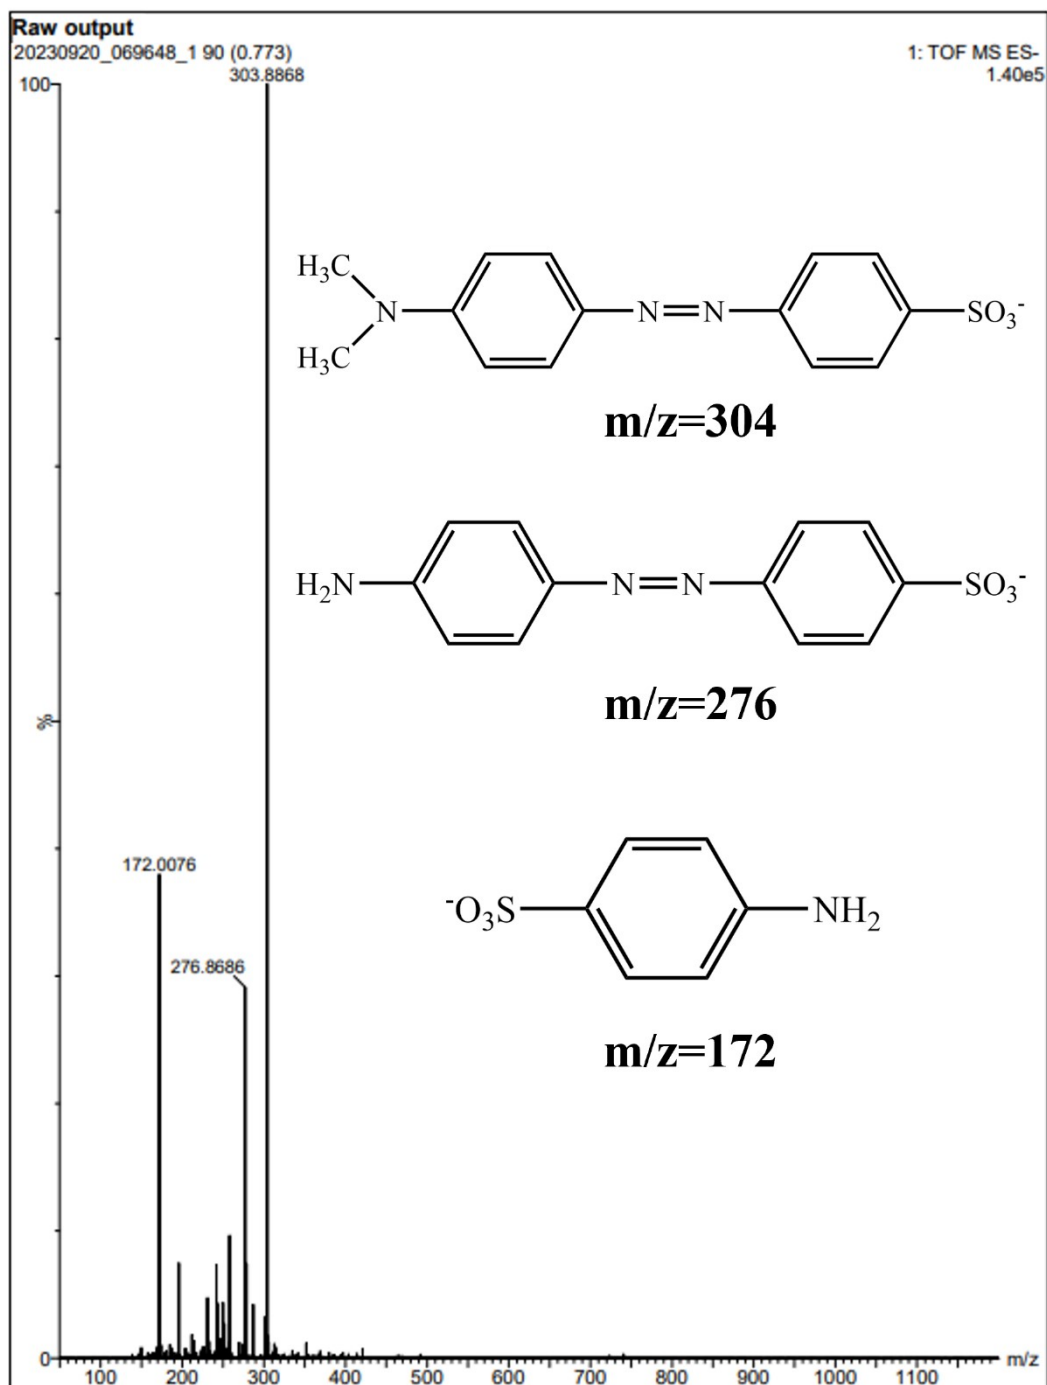

**Fig. S17** LC-MS spectra of intermediates corresponding to a degradation time of 2 min.

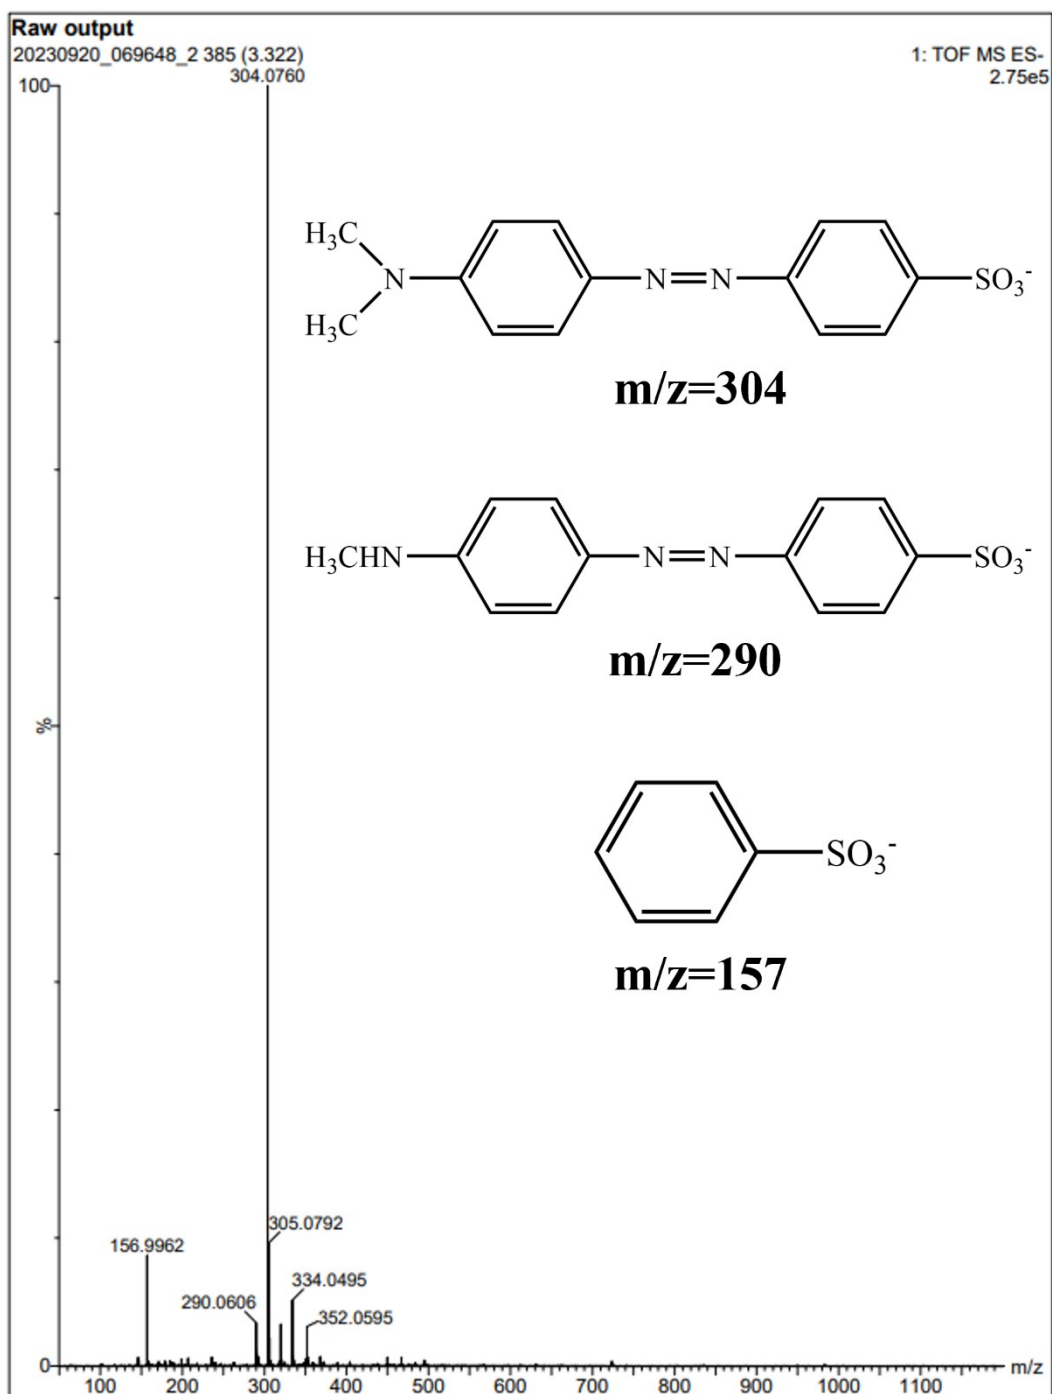

**Fig. S18** LC-MS spectra of intermediates corresponding to a degradation time of 5 min.

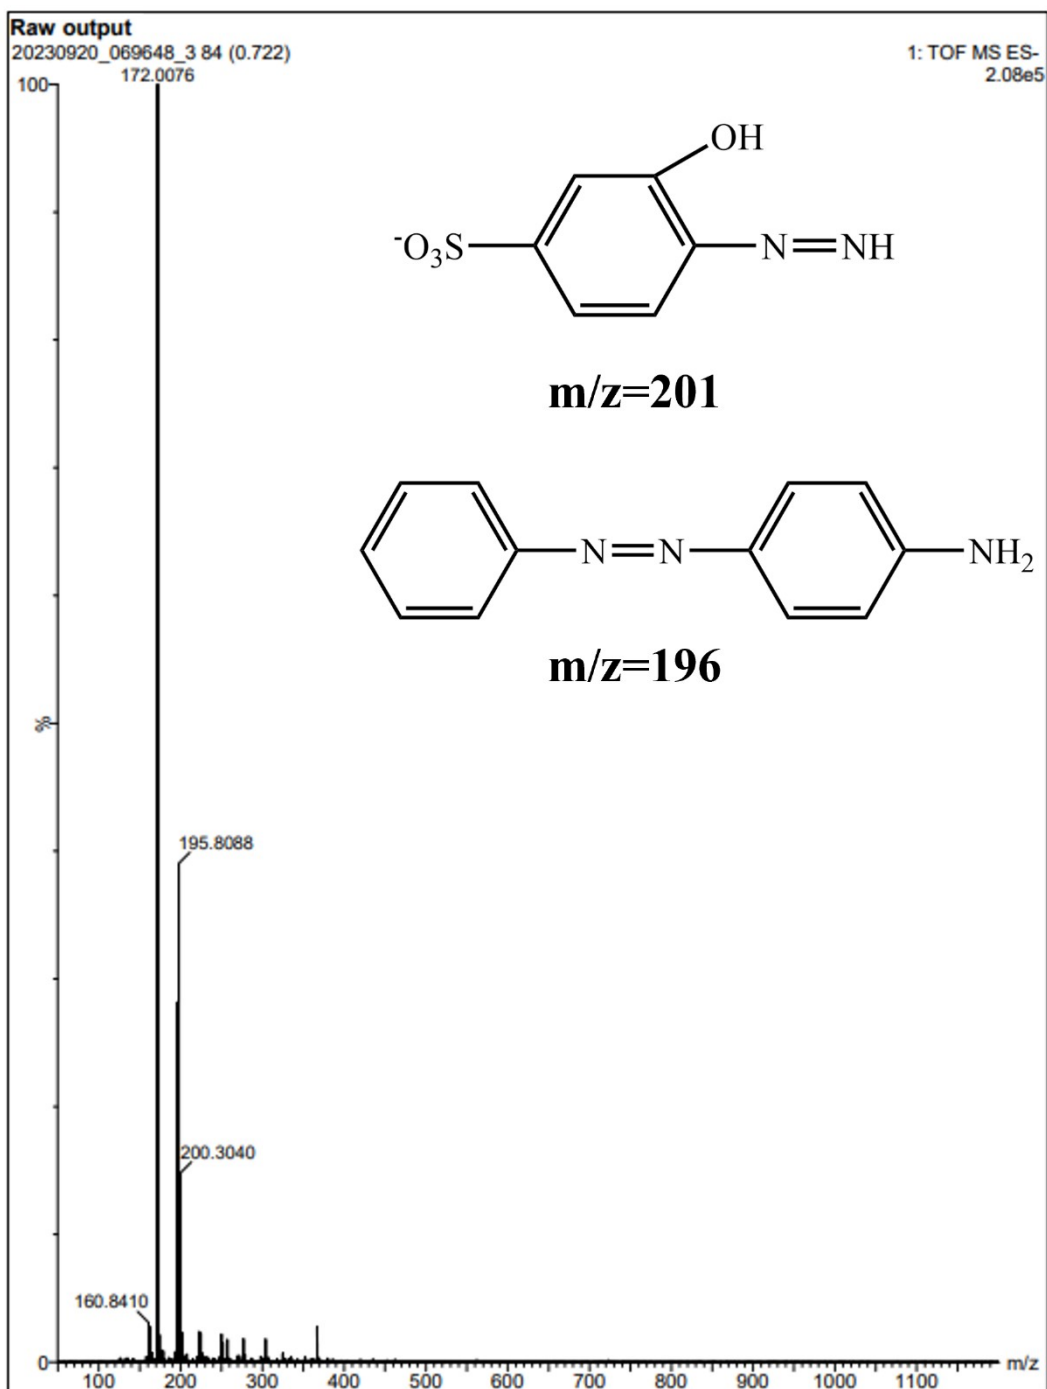

**Fig. S19** LC-MS spectra of intermediates corresponding to a degradation time of 10 min.



**Table S1** Mass fractions of CuO and Cu<sub>2</sub>(OH)<sub>3</sub>NO<sub>3</sub> in different samples.

| Samples    | Cu <sub>2</sub> (OH) <sub>3</sub> NO <sub>3</sub> /% | CuO/% |
|------------|------------------------------------------------------|-------|
| CuO/CHN-9  | 53.8                                                 | 46.2  |
| CuO/CHN-15 | 60.2                                                 | 39.8  |
| CuO/CHN-24 | 71.2                                                 | 28.8  |
| CuO/CHN-30 | 85.4                                                 | 14.6  |
| CHN-45     | 98.8                                                 | 1.2   |
| CHN-H      | 97.5                                                 | 2.5   |

**Table S2** Specific surface area of the samples.

| sample                                               | CuO/CHN-15 | CuO/CHN-24 | CHN-45 | CHN-H  |
|------------------------------------------------------|------------|------------|--------|--------|
| S <sub>BET</sub> /(m <sup>2</sup> ·g <sup>-1</sup> ) | 28.85      | 44.37      | 26.99  | 33.49  |
| Pore Volume(cm <sup>3</sup> ·g <sup>-1</sup> )       | 0.1066     | 0.1269     | 0.0463 | 0.0792 |

**Table S3** The atomic percent of different oxygen atoms determined by XPS.

| Samples    | Atom percent (%)  |                                     |                  |
|------------|-------------------|-------------------------------------|------------------|
|            | O <sub>latt</sub> | O <sub>v</sub> and O <sub>O-H</sub> | O <sub>N-O</sub> |
| CuO/CHN-15 | 16.32             | 30.49                               | 53.19            |
| CuO/CHN-24 | 15.35             | 39.24                               | 45.41            |
| CHN-45     | 0                 | 40.36                               | 59.64            |
| CHN-H      | 0                 | 60.97                               | 39.03            |

**Table S4** Comparison of MO degradation activities of different catalysts.

| Catalyst                                                                            | Degradation condition                                                             | Degradation time (min) | Degradation rate (%) | Ref       |
|-------------------------------------------------------------------------------------|-----------------------------------------------------------------------------------|------------------------|----------------------|-----------|
| CuO/Cu <sub>2</sub> (OH) <sub>3</sub> NO <sub>3</sub>                               | [catalyst]=20 mg<br>[pollutant]=20 mg/L<br>CWAO                                   | 8                      | 96                   | This Work |
| TiO <sub>2</sub> /Ti <sub>3</sub> C <sub>2</sub>                                    | [catalyst]= 60 mg<br>[pollutant]=20 mg/L<br>375 W Hg lamp                         | 40                     | 99.6                 | [1]       |
| In <sub>2</sub> S <sub>3</sub>                                                      | [catalyst]= 20 mg<br>[pollutant]= 10 mg/L<br>300 W Xe lamp                        | 20                     | 97                   | [2]       |
| BaTi <sub>0.89</sub> Sn <sub>0.11</sub> O <sub>3</sub>                              | [catalyst]=1 g/L<br>[pollutant]=10 mg/L<br>Piezocatalytic                         | 60                     | 100                  | [3]       |
| Ag@AgVO <sub>3</sub> /BiOCl                                                         | [catalyst]=10 mg<br>[pollutant]=10 mg/L<br>solar photocatalysis                   | 50                     | 100                  | [4]       |
| Cu <sub>2</sub> (OH) <sub>3</sub> NO <sub>3</sub> /ZnO                              | [catalyst]=0.4 g/L<br>[pollutant]=15 mg/L<br>CWAO                                 | 20                     | 97                   | [5]       |
| Co <sub>3</sub> O <sub>4</sub> -CuO                                                 | [catalyst]= 20 mg<br>[pollutant]=20 mg/L<br>ABET technologies<br>solar simulator. | 120                    | 79                   | [6]       |
| g-C <sub>3</sub> N <sub>4</sub> /TiO <sub>2</sub> /ZnIn <sub>2</sub> S <sub>4</sub> | [catalyst]= 30 mg<br>[pollutant]=30 mg/L<br>300 W Xe lamp                         | 30                     | 97.5                 | [7]       |
| Cu-FeOOH/TCN                                                                        | [catalyst]=20 mg<br>[pollutant]=40 mg/L<br>500 W Xe lamp                          | 70                     | 97.8                 | [8]       |

## Notes and references

- 1 H. Li, B. Sun, T. Gao, H. Li, Y. Ren and G. Zhou, *Chinese J. Catal.*, 2022, **43**, 461–471.
- 2 Y. Liu, C. Chen, Y. He, Z. Zhang, M. Li, C. Li, X. Chen, Y. Han and Z. Shi, *Small*, 2022, **18**, 2201556.
- 3 Q. Zhao, H. Xiao, G. Huangfu, Z. Zheng, J. Wang, F. Wang and Y. Guo, *Nano Energy*, 2021, **85**, 106028.
- 4 A. Kuila, P. Saravanan, D. Bahnemann and C. Wang, *Appl. Catal. B*, 2021, **293**, 120224.
- 5 T. Dai and Y. Mao, *Chem. Phys. Lett.*, 2020, **739**, 137018.
- 6 R. R. Nallapureddy, M. R. Pallavolu, J. Nallapureddy, A. K. Yedluri and S. W. Joo, *J. Clean. Prod.*, 2023, **382**, 135302.
- 7 H. Liu, F. Sun, X. Li, Q. Ma, G. Liu, H. Yu, W. Yu, X. Dong and Z. Su, *Compos. B. Eng.*, 2023, **259**, 110746.
- 8 J. Tang, R. Xu, G. Sui, D. Guo, Z. Zhao, S. Fu, X. Yang, Y. Li and J. Li, *Small*, 2023, **19**, 2208232.
